# Supplementary material for: Structure of cyanobacterial phycobilisome core revealed by structural modeling and chemical cross-linking
Source: PubMed Central journal article supplement — Sci Adv. 2021 Jan 6;7(2):eaba5743. doi: 10.1126/sciadv.aba5743 (PMC7787483; doi:10.1126/sciadv.aba5743), 2021-01-06
Supplement: aba5743_SM.pdf [file aba5743_SM.pdf]

## Supplementary Materials for

### **Structure of cyanobacterial phycobilisome core revealed by structural modeling and chemical cross-linking**

Haijun Liu\*, Mengru M. Zhang, Daniel A. Weisz, Ming Cheng, Himadri B. Pakrasi, Robert E. Blankenship

\*Corresponding author. Email: [liuhaijun@wustl.edu](mailto:liuhaijun@wustl.edu)

Published 6 January 2021, *Sci. Adv.* 7, eaba5743 (2021)  
DOI: 10.1126/sciadv.aba5743

#### **This PDF file includes:**

Tables S1 to S6  
Figs. S1 to S6

Structure of cyanobacterial phycobilisome core-SM

**Table S1. Structure alignment between different PBS (s, *Synechocystis* 6803) subunits and the corresponding components in PpPBS-core (PDBID: 6KGX).** All predicted homology models are included. Three cylinders are evaluated independently based on the location of various subunits. The RMSD value is calculated among all C $\alpha$  in the two corresponded structures given by PyMOL software.

|                                                 |           | Alignment with PpPBS-core,<br>(6KGX) RMSD (Å) |            |
|-------------------------------------------------|-----------|-----------------------------------------------|------------|
|                                                 |           | Basal Cylinder                                | Cylinder B |
| <b>sApcA/B</b>                                  |           | (A) 0.621/0.725                               | 0.59/0.608 |
|                                                 |           | (A') 0.762/0.771                              |            |
| <b>sApcC</b>                                    |           | 0.665                                         |            |
| <b>sApcD</b>                                    |           | 0.912                                         | -          |
| <b>sApcE<br/>(or <math>\alpha^{LCM}</math>)</b> | <b>M1</b> | 0.535                                         | -          |
|                                                 | <b>M2</b> | 0.647                                         | -          |
|                                                 | <b>M3</b> | 0.770                                         | -          |
|                                                 | <b>M4</b> | 0.563                                         | -          |
|                                                 | <b>M5</b> | 0.739                                         | -          |
| <b>sApcE_LD1</b>                                | <b>M1</b> | 0.692                                         |            |
| <b>sApcE_LD2</b>                                | <b>M1</b> | 1.005                                         | -          |
| <b>sApcE_LD3</b>                                | <b>M1</b> | -                                             | 0.473      |
|                                                 | <b>M2</b> | -                                             | 0.733      |
|                                                 | <b>M3</b> | -                                             | 0.724      |
|                                                 | <b>M4</b> | -                                             | 0.703      |
|                                                 | <b>M5</b> | -                                             | 1.833      |
| <b>sApcF</b>                                    | <b>M1</b> | 0.791                                         | -          |

## Structure of cyanobacterial phycobilisome core-SM

**Table S2. MS-information of the inter cross-links in WT-PBS.**

| Raw file scan number                  | Charge | Precursor Mass | Cross-linking sites                                    | Subunit sites        | #  |
|---------------------------------------|--------|----------------|--------------------------------------------------------|----------------------|----|
| 072815_PBS_X02_02.16890.16890.4.0.dta | 4      | 4039.1570      | AASVISANAATIVKEAVAK(14)-<br>DITKAYSQISYSLESQVR(4)      | ApcB (53)-ApcE (296) | 1  |
| 072815_PBS_X02_02.16840.16840.4.0.dta | 4      | 4051.2340      |                                                        |                      |    |
| 072815_PBS_X02_02.11205.11205.4.1.dta | 4      | 2906.6930      | AASVISANAATIVKEAVAK(14)-<br>VDKEVT(3)                  | ApcB (53)-ApcE (685) | 2  |
| 072815_PBS_X02_02.11186.11186.4.0.dta | 4      | 2894.6240      |                                                        |                      |    |
| 072815_PBS_X02_01.27051.27051.3.0.dta | 3      | 1855.0170      | AITTAASR(1)-<br>MFDVFTR(1)                             | cpcC1 (2)-cpcB (1)   | 3  |
| 072815_PBS_X02_01.27163.27163.3.1.dta | 3      | 1842.9390      |                                                        |                      |    |
| 072815_PBS_X02_01.34996.34996.3.0.dta | 3      | 2164.2270      | ALPLLNYPK(1)-<br>MFDVFTR(1)                            | cpcG1 (2)-cpcB (1)   | 4  |
| 072815_PBS_X02_01.35148.35148.3.0.dta | 3      | 2152.1510      |                                                        |                      |    |
| 072815_PBS_X02_01.24141.24141.4.0.dta | 4      | 3390.8150      | DAVTTLIKNYDLTGR(8)-<br>SIVTKSIVNADAEAR(5)              | ApcF (10)-ApcA (6)   | 5  |
| 072815_PBS_X02_01.24117.24117.4.1.dta | 4      | 3402.8870      |                                                        |                      |    |
| 072815_PBS_X02_02.5149.5149.4.0.dta   | 4      | 2197.1860      | ETIVKQAGDR(5)-<br>VDKEVT(3)                            | ApcA (52)-ApcE (685) | 6  |
| 072815_PBS_X02_02.5066.5066.4.0.dta   | 4      | 2209.2510      |                                                        |                      |    |
| 072815_PBS_X02_02.13696.13696.4.0.dta | 4      | 4392.3690      | GPAVNNQVGNPSAVGEFPGSLGAKV<br>FR(24)-SIVTKSIVNADAEAR(5) | ApcE (511)-ApcA (6)  | 7  |
| 072815_PBS_X02_02.13739.13739.4.0.dta | 4      | 4380.2950      |                                                        |                      |    |
| 072815_PBS_X02_02.8194.8194.4.0.dta   | 4      | 2341.3990      | IKAFVTGGAAR(2)-E<br>KVLESQR(2)                         | ApcA (27)-cpcG1 (64) | 8  |
| 072815_PBS_X02_02.8220.8220.4.0.dta   | 4      | 2329.3260      |                                                        |                      |    |
| 072815_PBS_X02_01.25344.25344.3.0.dta | 3      | 2155.2090      | IKAFVTGGAAR(2)-<br>MFDVFTR(1)                          | ApcA (27)-cpcB (1)   | 9  |
| 072815_PBS_X02_01.25378.25378.3.0.dta | 3      | 2143.1360      |                                                        |                      |    |
| 072815_PBS_X02_02.6559.6559.4.0.dta   | 4      | 2183.2970      | IKAFVTGGAAR(2)-<br>VDKEVT(3)                           | ApcA (27)-ApcE (685) | 10 |
| 072815_PBS_X02_02.6634.6634.4.0.dta   | 4      | 2171.2210      |                                                        |                      |    |
| 072815_PBS_X02_01.29273.29273.3.0.dta | 3      | 2353.2470      | LGGKVASITPASLS(4)-<br>MFDVFTR(1)                       | cpcC1 (281)-cpcB (1) | 11 |
| 072815_PBS_X02_01.29232.29232.2.0.dta | 2      | 2365.3180      |                                                        |                      |    |
| 072815_PBS_X02_02.9576.9576.4.0.dta   | 4      | 2498.3700      | LKSYPASGELR(2)-<br>IKAFVTGGAAR(2)                      | ApcB (28)-ApcA (27)  | 12 |
| 072815_PBS_X02_02.9474.9474.4.1.dta   | 4      | 2510.4480      |                                                        |                      |    |
| 072815_PBS_X02_01.30404.30404.3.0.dta | 3      | 3057.6410      | MKTPLTEAVSTADSQGR(1)-<br>ETIVKQAGDR(5)                 | cpcA (1)-ApcA (52)   | 13 |
| 072815_PBS_X02_01.31395.31395.3.0.dta | 3      | 3045.5670      |                                                        |                      |    |
| 072815_PBS_X02_01.23741.23741.3.0.dta | 3      | 2872.4590      | MKTPLTEAVSTADSQGR(2)-<br>MFDVFTR(1)                    | cpcA (2)-cpcB (1)    | 14 |
| 072815_PBS_X02_01.23767.23767.3.0.dta | 3      | 2860.3860      |                                                        |                      |    |
| 072815_PBS_X02_01.30665.30665.3.0.dta | 3      | 2949.4220      | MLGQSSLVGYSNTQAANR(1)-<br>MFDVFTR(1)                   | cpcD (1)-cpcB (1)    | 15 |
| 072815_PBS_X02_01.30533.30533.3.1.dta | 3      | 2961.5010      |                                                        |                      |    |
| 072815_PBS_X02_01.22492.22492.3.0.dta | 3      | 3825.8750      | MLGQSSLVGYSNTQAANR(1)-<br>MKTPLTEAVSTADSQGR(1)         | cpcD (1)-cpcA (1)    | 16 |
| 072815_PBS_X02_01.22359.22359.3.0.dta | 3      | 3837.9500      |                                                        |                      |    |
| 072815_PBS_X02_01.27937.27937.3.0.dta | 3      | 3471.8040      | MQDAITAVINSADVQGK(1)-<br>SIVTKSIVNADAEAR(5)            | ApcB (1)-ApcA (6)    | 17 |
| 072815_PBS_X02_01.28017.28017.3.1.dta | 3      | 3483.8780      |                                                        |                      |    |

PBS-core related cross-links (lime)

Structure of cyanobacterial phycobilisome core-SM

Table S2. MS-information of the inter cross-links in WT-PBS (continued).

| Raw file scan number                  | Charge | Precursor_Mass | Cross-linking sites                                         | Subunit sites              | #   |
|---------------------------------------|--------|----------------|-------------------------------------------------------------|----------------------------|-----|
| 072815_PBS_X02_02.17319.17319.4.0.dta | 4      | 4767.4620      | MQDAITAVINSADVQGYLDGAAM<br>DK(17)-IFTGGSPLSYLEKPVER(13)     | ApcB (17)-ApcE<br>(87)     | 18  |
| 072815_PBS_X02_01.30217.30217.4.0.dta | 4      | 4755.3910      |                                                             |                            |     |
| 072815_PBS_X02_01.26492.26492.3.0.dta | 3      | 3028.5940      | NAMDELKAYFESGSAR(7)-<br>IKAFVTGGAAR(2)                      | ApcF (28)-ApcA<br>(27)     | 19  |
| 072815_PBS_X02_01.26530.26530.3.0.dta | 3      | 3016.5220      |                                                             |                            |     |
| 072815_PBS_X02_01.24032.24032.3.0.dta | 3      | 2101.1290      | NQKTVGFSTR(3)-<br>MFDVFTR(1)                                | cpcC2 (161)-<br>cpcB (1)   | 20  |
| 072815_PBS_X02_01.23987.23987.3.0.dta | 3      | 2089.0530      |                                                             |                            |     |
| 072815_PBS_X02_02.10300.10300.4.0.dta | 4      | 3858.0760      | SINPAANTIPKVSQAQNIIEASVPR(11)-<br>ETIVKQAGDR(5)             | cpcG1 (234)-<br>ApcA (52)  | 21  |
| 072815_PBS_X02_02.10268.10268.4.1.dta | 4      | 3870.1460      |                                                             |                            |     |
| 072815_PBS_X02_01.23079.23079.4.0.dta | 4      | 4610.4860      | SINPAANTIPKVSQAQNIIEASVPR(11)-<br>MKEAALDIVNDPNGITR(2)      | cpcG1 (234)-<br>cpcB (135) | 22  |
| 072815_PBS_X02_01.23144.23144.4.0.dta | 4      | 4598.4240      |                                                             |                            |     |
| 072815_PBS_X02_01.15644.15644.4.0.dta | 4      | 2475.3290      | SIVTKSIVNADAEAR(5)-<br>IMKMGGK(3)                           | ApcA (6)-ApcC<br>(45)      | 23  |
| 072815_PBS_X02_01.15437.15437.3.0.dta | 3      | 2487.4030      |                                                             |                            |     |
| 072815_PBS_X02_01.23179.23179.3.0.dta | 3      | 3123.6500      | SIVTKSIVNADAEAR(5)-<br>KQFFFPFINSR(1)                       | ApcA (6)-ApcE<br>(331)     | 24  |
| 072815_PBS_X02_01.23164.23164.3.1.dta | 3      | 3135.7200      |                                                             |                            |     |
| 072815_PBS_X02_02.8790.8790.4.1.dta   | 4      | 2590.4410      | SIVTKSIVNADAEAR(5)-<br>LYNKLT(4)                            | ApcA (6)-ApcE<br>(875)     | 25  |
| 072815_PBS_X02_02.8778.8778.4.1.dta   | 4      | 2602.5180      |                                                             |                            |     |
| 072815_PBS_X02_02.8310.8310.4.0.dta   | 4      | 2589.4240      | SIVTKSIVNADAEAR(5)-<br>QQTkvfk(4)                           | ApcA (6)-ApcE<br>(722)     | 26  |
| 072815_PBS_X02_02.8239.8239.4.0.dta   | 4      | 2601.4980      |                                                             |                            |     |
| 072815_PBS_X02_01.33620.33620.3.0.dta | 3      | 3504.9070      | SNKAVIVPFEQLNQLTQQINR(3)-<br>MFDVFTR(1)                     | cpcC1 (259)-<br>cpcB (1)   | 27  |
| 072815_PBS_X02_01.33652.33652.3.0.dta | 3      | 3492.8470      |                                                             |                            |     |
| 072815_PBS_X02_01.32003.32003.4.0.dta | 4      | 5643.8230      | VEGYEIGSEKPVVFTTENILSSDMDNLIEAYR(11)-<br>VEITAIAPGYPKVR(13) | cpcG1 (27)-<br>cpcC1 (253) | 28  |
| 072815_PBS_X02_01.32115.32115.4.0.dta | 4      | 5655.8990      |                                                             |                            |     |
| 072815_PBS_X02_01.26928.26928.3.0.dta | 3      | 2653.4060      | VEITAIAPGYPKVR(13)-<br>MFDVFTR(1)                           | cpcC1 (253)-<br>cpcB (1)   | 29  |
| 072815_PBS_X02_01.26882.26882.3.0.dta | 3      | 2665.4800      |                                                             |                            |     |
| 072815_PBS_X02_01.29488.29488.4.3.dta | 4      | 4759.7300      | VLNGLKETYNLSGVPISSTVQAIQAIK(6)-<br>IVKVELATGRPGTNAGLA(3)    | ApcB (113)-ApcC<br>(52)    | 30  |
| 072815_PBS_X02_02.16899.16899.4.3.dta | 4      | 4747.6140      |                                                             |                            |     |
| 072815_PBS_X02_02.16035.16035.4.0.dta | 4      | 3924.1670      | VLNGLKETYNLSGVPISSTVQAIQAIK(6)-<br>VDKEVTPR(3)              | ApcB (113)-ApcE<br>(685)   | 31  |
| 072815_PBS_X02_02.16020.16020.4.0.dta | 4      | 3936.2400      |                                                             |                            |     |
| 072815_PBS_X02_01.15130.15130.4.1.dta | 4      | 2317.2840      | YLDGAAMDK(9)-<br>VDKEVTPR(3)                                | ApcB (26)-ApcE<br>(685)    | 32  |
| 072815_PBS_X02_01.15173.15173.4.0.dta | 4      | 2305.2090      |                                                             |                            |     |
|                                       |        |                |                                                             | FNR(69)-CpcB(1)            | 33* |

PBS-core related cross-links (lime), \*Liu *et al.*, 2019, mBio Ref#27

## Structure of cyanobacterial phycobilisome core-SM

**Table S3. MS-information of the inter cross-links in CK-PBS.**

| Raw file scan number                 | Charge | Precursor_Mass | Cross-linking sites                                | Subunit sites               | #          |
|--------------------------------------|--------|----------------|----------------------------------------------------|-----------------------------|------------|
| 072815_CK_X02_01.28466.28466.4.2.dta | 4      | 4051.232       | AASVISANAATIVKEAVAK(14)-DITKAYSQSISYLESQVR(4)      | <b>ApcB (53)-ApcE (296)</b> | <b>1*</b>  |
| 072815_CK_X02_01.28474.28474.4.0.dta | 4      | 4039.157       |                                                    |                             |            |
| 072815_CK_X02_02.13676.13676.4.0.dta | 4      | 3041.741       | AASVISANAATIVKEAVAK(14)-IKAFVTGGAAR(2)             | ApcB (53)-ApcA (27)         | 2          |
| 072815_CK_X02_02.13646.13646.4.2.dta | 4      | 3053.812       |                                                    |                             |            |
| 072815_CK_X02_01.20034.20034.4.0.dta | 4      | 2894.625       | AASVISANAATIVKEAVAK(14)-VDKEVTTPR(3)               | <b>ApcB (53)-ApcE (685)</b> | <b>3*</b>  |
| 072815_CK_X02_01.19943.19943.4.0.dta | 4      | 2906.693       |                                                    |                             |            |
| 072815_CK_X02_01.27971.27971.3.0.dta | 3      | 4282.235       | APLNQKEIQYNYQILASQGLK(6)-MQDAITAVINSADVQGK(1)      | ApcE (817)-ApcB (1)         | 4          |
| 072815_CK_X02_01.27925.27925.3.0.dta | 3      | 4294.307       |                                                    |                             |            |
| 072815_CK_X02_01.20872.20872.3.0.dta | 3      | 4095.211       | APLNQKEIQYNYQILASQGLK(6)-SIVTKSIVNADAEAR(5)        | ApcE (817)-ApcA (6)         | 5          |
| 072815_CK_X02_01.20898.20898.3.0.dta | 3      | 4107.287       |                                                    |                             |            |
| 072815_CK_X02_01.23068.23068.3.0.dta | 3      | 3402.881       | DAVTTLIKNYDLTGR(8)-SIVTKSIVNADAEAR(5)              | <b>ApcF (10)-ApcA (6)</b>   | <b>6*</b>  |
| 072815_CK_X02_01.23227.23227.3.0.dta | 3      | 3390.815       |                                                    |                             |            |
| 072815_CK_X02_01.24136.24136.3.1.dta | 3      | 2767.652       | ELVVPSPFPVVKVGG(12)-IKAFVTGGAAR(2)                 | ApcE (893)-ApcA (27)        | 7          |
| 072815_CK_X02_01.24193.24193.3.0.dta | 3      | 2755.583       |                                                    |                             |            |
| 072815_CK_X02_01.8063.8063.3.0.dta   | 3      | 2209.254       | ETIVKQAGDR(5)-VDKEVTTPR(3)                         | <b>ApcA (52)-ApcE (685)</b> | <b>8*</b>  |
| 072815_CK_X02_01.8173.8173.3.0.dta   | 3      | 2197.181       |                                                    |                             |            |
| 072815_CK_X02_01.31333.31333.3.0.dta | 3      | 3890.911       | EVASGLMSSDDAAEASAYDFVIGKMS(25)-VDKEVTTPR(3)        | ApcA (159)-ApcE (685)       | 9          |
| 072815_CK_X02_01.31398.31398.3.0.dta | 3      | 3878.819       |                                                    |                             |            |
| 072815_CK_X02_02.13993.13993.4.3.dta | 4      | 3909.162       | GPAVNNQVGNPSAVGEFPGSLGAKVFR(24)-IKAFVTGGAAR(2)     | ApcE (511)-ApcA (27)        | 10         |
| 072815_CK_X02_02.13996.13996.4.0.dta | 4      | 3897.083       |                                                    |                             |            |
| 072815_CK_X02_02.14524.14524.4.2.dta | 4      | 4392.373       | GPAVNNQVGNPSAVGEFPGSLGAKVFR(24)-SIVTKSIVNADAEAR(1) | ApcE (511)-ApcA (2)         | 11         |
| 072815_CK_X02_02.14846.14846.4.1.dta | 4      | 4380.288       |                                                    |                             |            |
| 072815_CK_X02_02.14655.14655.4.2.dta | 4      | 4392.372       | GPAVNNQVGNPSAVGEFPGSLGAKVFR(24)-SIVTKSIVNADAEAR(5) | <b>ApcE (511)-ApcA (6)</b>  | <b>12*</b> |
| 072815_CK_X02_02.14627.14627.4.0.dta | 4      | 4380.287       |                                                    |                             |            |
| 072815_CK_X02_02.8677.8677.4.0.dta   | 4      | 2175.265       | IKAFVTGGAAR(2)-LAKSPLYR(3)                         | ApcA (27)-ApcE (325)        | 13         |
| 072815_CK_X02_02.8629.8629.4.0.dta   | 4      | 2187.343       |                                                    |                             |            |
| 072815_CK_X02_01.11543.11543.4.0.dta | 4      | 2183.295       | IKAFVTGGAAR(2)-VDKEVTTPR(3)                        | <b>ApcA (27)-ApcE (685)</b> | <b>14*</b> |
| 072815_CK_X02_01.11395.11395.4.0.dta | 4      | 2171.219       |                                                    |                             |            |
| 072815_CK_X02_01.16550.16550.4.0.dta | 4      | 2510.449       | LKSYFASGELR(2)-IKAFVTGGAAR(2)                      | <b>ApcB (28)-ApcA (27)</b>  | <b>15*</b> |
| 072815_CK_X02_01.16959.16959.4.0.dta | 4      | 2498.374       |                                                    |                             |            |
| 072815_CK_X02_01.26259.26259.3.0.dta | 3      | 2988.585       | MQDAITAVINSADVQGK(1)-IKAFVTGGAAR(2)                | ApcB (1)-ApcA (27)          | 16         |
| 072815_CK_X02_01.26095.26095.3.0.dta | 3      | 3000.638       |                                                    |                             |            |
| 072815_CK_X02_01.25154.25154.3.0.dta | 3      | 2776.459       | MQDAITAVINSADVQGK(1)-QQTQVFK(4)                    | ApcB (1)-ApcE (722)         | 17         |
| 072815_CK_X02_01.25144.25144.3.0.dta | 3      | 2788.536       |                                                    |                             |            |

\* are identified in WT-PBS

## Structure of cyanobacterial phycobilisome core-SM

**Table S3. MS-information of the inter cross-links in CK-PBS (Continued).**

| Raw file scan number                 | Charge | Precursor_Mass | Cross-linking sites                                      | Subunit sites                | #          |
|--------------------------------------|--------|----------------|----------------------------------------------------------|------------------------------|------------|
| 072815_CK_X02_01.26915.26915.3.0.dta | 3      | 3483.881       | MQDAITAVINSADVQGGK(1)-<br>SIVTKSIVNADAEAR(5)             | <b>ApcB (1)-ApcA (6)</b>     | <b>18*</b> |
| 072815_CK_X02_01.27064.27064.3.0.dta | 3      | 3471.804       |                                                          |                              |            |
| 072815_CK_X02_01.24450.24450.3.2.dta | 3      | 2841.475       |                                                          |                              |            |
| 072815_CK_X02_02.15339.15339.3.1.dta | 3      | 2853.542       | MQDAITAVINSADVQGGK(1)-VDKEVTPR(3)                        | ApcB (1)-ApcE (685)          | 19         |
| 072815_CK_X02_01.23159.23159.4.1.dta | 4      | 3991.06        | MQDAITAVINSADVQGGKYLGAAMDK(17)-<br>ETIVKQAGDR(5)         | ApcB (17)-ApcA (52)          | 20         |
| 072815_CK_X02_01.23177.23177.4.0.dta | 4      | 3978.996       |                                                          |                              |            |
| 072815_CK_X02_01.23209.23209.4.2.dta | 4      | 4120.12        | MQDAITAVINSADVQGGKYLGAAMDK(17)-<br>IAETLAENEKK(10)       | ApcB (17)-ApcD (48)          | 21         |
| 072815_CK_X02_02.14536.14536.4.0.dta | 4      | 4108.051       |                                                          |                              |            |
| 072815_CK_X02_01.29018.29018.4.0.dta | 4      | 4755.394       | MQDAITAVINSADVQGGKYLGAAMDK(17)-<br>IFTGGSPLSYLEKPVER(13) | <b>ApcB (17)-ApcE (87)</b>   | <b>22*</b> |
| 072815_CK_X02_01.29091.29091.4.1.dta | 4      | 4767.464       |                                                          |                              |            |
| 072815_CK_X02_01.25045.25045.4.0.dta | 4      | 3965.083       | MQDAITAVINSADVQGGKYLGAAMDK(17)-<br>IKAFVTGGAAR(2)        | ApcB (17)-ApcA (27)          | 23         |
| 072815_CK_X02_01.25076.25076.4.0.dta | 4      | 3953.009       |                                                          |                              |            |
| 072815_CK_X02_01.23178.23178.4.0.dta | 4      | 3805.904       | MQDAITAVINSADVQGGKYLGAAMDK(17)-<br>VDKEVTPR(3)           | ApcB (17)-ApcE (685)         | 24         |
| 072815_CK_X02_01.23156.23156.4.2.dta | 4      | 3817.974       |                                                          |                              |            |
| 072815_CK_X02_01.25575.25575.3.0.dta | 3      | 3028.598       | NAMDELKAYFESGSAR(7)-<br>IKAFVTGGAAR(2)                   | <b>ApcF (28)-ApcA (27)</b>   | <b>25*</b> |
| 072815_CK_X02_01.25550.25550.3.0.dta | 3      | 3016.522       |                                                          |                              |            |
| 072815_CK_X02_01.14770.14770.3.0.dta | 3      | 2475.326       | SIVTKSIVNADAEAR(5)-IMKMGKK(3)                            | <b>ApcA (6)-ApcC (45)</b>    | <b>26*</b> |
| 072815_CK_X02_01.14689.14689.4.1.dta | 4      | 2487.402       |                                                          |                              |            |
| 072815_CK_X02_02.13643.13643.4.4.dta | 4      | 3135.712       | SIVTKSIVNADAEAR(5)-KQFFPEPINSR(1)                        | <b>ApcA (6)-ApcE (331)</b>   | <b>27*</b> |
| 072815_CK_X02_02.14058.14058.4.3.dta | 4      | 3123.645       |                                                          |                              |            |
| 072815_CK_X02_01.15684.15684.3.0.dta | 3      | 2602.523       | SIVTKSIVNADAEAR(5)-LYNKLT(4)                             | <b>ApcA (6)-ApcE (875)</b>   | <b>28*</b> |
| 072815_CK_X02_01.15755.15755.3.0.dta | 3      | 2590.44        |                                                          |                              |            |
| 072815_CK_X02_01.14561.14561.3.0.dta | 3      | 2589.422       | SIVTKSIVNADAEAR(5)-QQTQVFK(4)                            | <b>ApcA (6)-ApcE (722)</b>   | <b>29*</b> |
| 072815_CK_X02_01.14513.14513.3.0.dta | 3      | 2601.497       |                                                          |                              |            |
| 072815_CK_X02_01.13791.13791.4.1.dta | 4      | 2654.433       | SIVTKSIVNADAEAR(5)-VDKEVTPR(3)                           | ApcA (6)-ApcE (685)          | 30         |
| 072815_CK_X02_01.13832.13832.4.0.dta | 4      | 2666.513       |                                                          |                              |            |
| 072815_CK_X02_01.26917.26917.4.0.dta | 4      | 4097.244       | VLNGLKETYNLSLGPISSTVQAIQAIK(6)-<br>ETIVKQAGDR(5)         | ApcB (113)-ApcA (52)         | 31         |
| 072815_CK_X02_01.26934.26934.4.0.dta | 4      | 4109.327       |                                                          |                              |            |
| 072815_CK_X02_01.28355.28355.4.0.dta | 4      | 4759.737       | VLNGLKETYNLSLGPISSTVQAIQAIK(6)-<br>IVKVELATGRPGTNAGLA(3) | <b>ApcB (113)-ApcC (52)</b>  | <b>32*</b> |
| 072815_CK_X02_01.28354.28354.4.3.dta | 4      | 4747.628       |                                                          |                              |            |
| 072815_CK_X02_02.17119.17119.4.0.dta | 4      | 3924.171       | VLNGLKETYNLSLGPISSTVQAIQAIK(6)-<br>VDKEVTPR(3)           | <b>ApcB (113)-ApcE (685)</b> | <b>33*</b> |
| 072815_CK_X02_02.17138.17138.4.0.dta | 4      | 3936.243       |                                                          |                              |            |
| 072815_CK_X02_01.17514.17514.4.0.dta | 4      | 2464.405       | YLDGAAMDCLK(9)-IKAFVTGGAAR(2)                            | ApcB (26)-ApcA (27)          | 34         |
| 072815_CK_X02_01.17564.17564.4.0.dta | 4      | 2452.33        |                                                          |                              |            |
| 072815_CK_X02_01.14358.14358.3.0.dta | 3      | 2317.286       | YLDGAAMDCLK(9)-VDKEVTPR(3)                               | <b>ApcB (26)-ApcE (685)</b>  | <b>35*</b> |
| 072815_CK_X02_01.14412.14412.3.1.dta | 3      | 2305.212       |                                                          |                              |            |

\* are identified in WT-PBS

Structure of cyanobacterial phycobilisome core-SM

**Table S4. Cross-links identified in CpcL-PBS.**

| Raw file scan number                 | Charge | Precursor_Mass | Cross-linking sites                               | Subunit sites             | #   |
|--------------------------------------|--------|----------------|---------------------------------------------------|---------------------------|-----|
| 072815_AB_X02_01.26910.26910.2.0.dta | 2      | 2365.315       | LGGKVASITPASLS(4)-MFDVFTR(1)                      | cpcC1 (281)-cpcB (1)      | 1   |
| 072815_AB_X02_01.26941.26941.2.0.dta | 2      | 2353.238       |                                                   |                           |     |
| 072815_AB_X02_01.23420.23420.3.0.dta | 3      | 1985.058       | MGGKIVSIK(4)-MFDVFTR(1)                           | FNR (69)-cpcB (1)         | 2   |
| 072815_AB_X02_01.23411.23411.3.2.dta | 3      | 1997.137       |                                                   |                           |     |
| 072815_AB_X02_02.9991.9991.4.0.dta   | 4      | 3030.568       | MKEAALDIVNDPNGITR(2)-<br>NQKTVGFSR(3)             | cpcB (135)-cpcC2<br>(161) | 3   |
| 072815_AB_X02_02.9965.9965.4.0.dta   | 4      | 3042.642       |                                                   |                           |     |
| 072815_AB_X02_02.12000.12000.4.2.dta | 4      | 3594.918       | MKEAALDIVNDPNGITR(2)-<br>VEITAIAPGYPKVR(13)       | cpcB (135)-cpcC1<br>(253) | 4   |
| 072815_AB_X02_02.11973.11973.4.0.dta | 4      | 3606.992       |                                                   |                           |     |
| 072815_AB_X02_01.24579.24579.3.1.dta | 3      | 2856.462       | MKTPLTEAVSTADSQGR(1)-<br>MFDVFTR(1)               | cpcA (1)-cpcB (1)         | 5   |
| 072815_AB_X02_01.30916.30916.3.1.dta | 3      | 2844.411       |                                                   |                           |     |
| 072815_AB_X02_01.24767.24767.3.0.dta | 3      | 2856.465       | MKTPLTEAVSTADSQGR(2)-<br>MFDVFTR(1)               | cpcA (2)-cpcB (1)         | 6   |
| 072815_AB_X02_01.24704.24704.3.0.dta | 3      | 2844.393       |                                                   |                           |     |
| 072815_AB_X02_01.28305.28305.3.0.dta | 3      | 2949.424       | MLGQSSLVGYSNTQAANR(1)-<br>MFDVFTR(1)              | cpcD (1)-cpcB (1)         | 7   |
| 072815_AB_X02_01.28303.28303.3.0.dta | 3      | 2961.502       |                                                   |                           |     |
| 072815_AB_X02_01.20517.20517.3.0.dta | 3      | 3837.95        | MLGQSSLVGYSNTQAANR(1)-<br>MKTPLTEAVSTADSQGR(2)    | cpcD (1)-cpcA (2)         | 8   |
| 072815_AB_X02_01.20532.20532.3.0.dta | 3      | 3825.877       |                                                   |                           |     |
| 072815_AB_X02_01.21994.21994.3.0.dta | 3      | 2089.055       | NQKTVGFSR(3)-MFDVFTR(1)                           | cpcC2 (161)-cpcB (1)      | 9   |
| 072815_AB_X02_01.21845.21845.3.0.dta | 3      | 2101.129       |                                                   |                           |     |
| 072815_AB_X02_02.15746.15746.4.1.dta | 4      | 4369.279       | SNKAVIVPFEQLNQLTQQINR(3)-<br>MKTPLTEAVSTADSQGR(1) | cpcC1 (259)-cpcA (1)      | 10  |
| 072815_AB_X02_02.15757.15757.4.1.dta | 4      | 4381.363       |                                                   |                           |     |
| 072815_AB_X02_01.31132.31132.3.0.dta | 3      | 2735.501       | TLPLIAYAPVSQNQR(1)-<br>MFDVFTR(1)                 | cpcG2 (2)-cpcB (1)        | 11  |
| 072815_AB_X02_01.31152.31152.3.0.dta | 3      | 2723.425       |                                                   |                           |     |
| 072815_AB_X02_01.29833.29833.3.0.dta | 3      | 3490.985       | TLPLIAYAPVSQNQR(1)-<br>TLPLIAYAPVSQNQR(1)         | cpcG2 (2)-cpcG2 (2)       | 12  |
| 072815_AB_X02_01.30065.30065.3.0.dta | 3      | 3478.906       |                                                   |                           |     |
| 072815_AB_X02_01.24799.24799.3.0.dta | 3      | 2665.482       | VEITAIAPGYPKVR(13)-<br>MFDVFTR(1)                 | cpcC1 (253)-cpcB (1)      | 13  |
| 072815_AB_X02_01.24859.24859.3.0.dta | 3      | 2653.408       |                                                   |                           |     |
|                                      |        |                |                                                   | FNR (1)-cpcB (1)          | 14* |

\*Liu et al., 2019 mBio Ref#27

## Structure of cyanobacterial phycobilisome core-SM

**Table S5. Composition of sPBS-core and N-terminal modifications, primary amine # (PA).**

| Subunits        | Copy # | MW (kDA) | Total MW       | N-termini | Lysine # | Total PA # |
|-----------------|--------|----------|----------------|-----------|----------|------------|
| ApcA            | 32     | 17.28    | 571.52         | S (2)     | 6        | 224        |
| ApcB            | 34     | 16.87    | 593.3          | M (1)     | 8        | 306        |
| ApcC            | 6      | 7.8      | 46.8           | ?         | 4        | 30         |
| ApcD            | 2      | 17.79    | 36.74          | S (2)     | 9        | 20         |
| ApcE            | 2      | 100.29   | 200.59         | S (2)     | 48       | 98         |
| ApcF            | 2      | 18.89    | 38.94          | M (1)     | 4        | 10         |
| <b>PBS-core</b> |        |          | <b>1487.89</b> |           |          | <b>688</b> |

**Table S6. Cross-links originally annotated as Intralinks.**

| Raw file scan number                 | Charge | Precursor_Mass | Cross-linking sites                            | Subunit sites       | #* |
|--------------------------------------|--------|----------------|------------------------------------------------|---------------------|----|
| 072815_CK_X02_02.14460.14460.4.2.dta | 4      | 3175.725       | AASVISANAATIVKEAVAK(14)-YLDGAAMDK(9)           | ApcB (53)-ApcB (26) | 1  |
| 072815_CK_X02_02.14458.14458.4.0.dta | 4      | 3187.799       |                                                |                     |    |
| 072815_CK_X02_01.11898.11898.4.0.dta | 4      | 2344.299       | IKAFVTGGAAR(2)-ETIVKQAGDR(5)                   | ApcA (27)-ApcA (52) | 2  |
| 072815_CK_X02_01.11570.11570.4.1.dta | 4      | 2356.372       |                                                |                     |    |
| 072815_CK_X02_02.16481.16481.4.0.dta | 4      | 4145.137       | MQDAITAVINSADVQGGYLDGAAMDK(17)-LKSYPFASGELR(2) | ApcB (17)-ApcB (28) | 3  |
| 072815_CK_X02_01.25953.25953.4.0.dta | 4      | 4133.06        |                                                |                     |    |
| 072815_CK_X02_01.16476.16476.3.1.dta | 3      | 2813.624       | SIVTKSIVNADAEAR(5)-IKAFVTGGAAR(2)              | ApcA (6)-ApcA (27)  | 4  |
| 072815_CK_X02_01.16396.16396.3.0.dta | 3      | 2801.55        |                                                |                     |    |

\*from 19 intralinks



## Structure of cyanobacterial phycobilisome core-SM

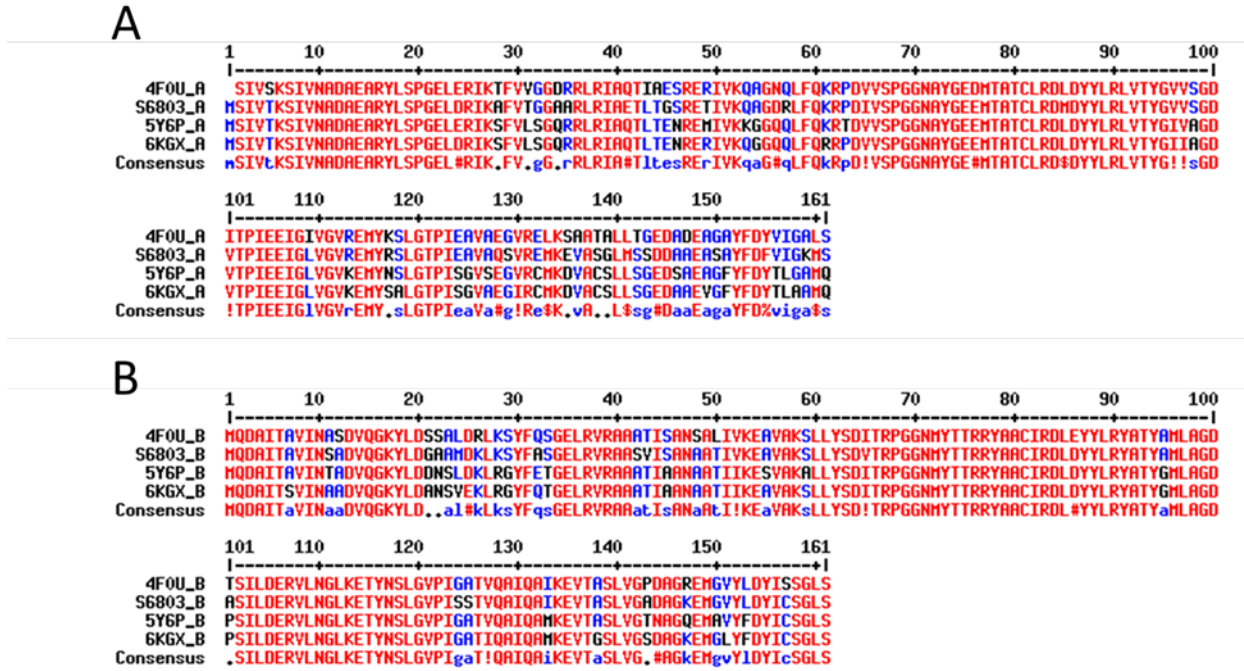

**Fig. S1. Sequence homology analysis of ApcA and ApcB.** (A) ApcA and (B) ApcB from 4F0U (PDBID), *Synechocystis* 6803 (S6803), GpPBS (PDBID: 5Y6P), and PpPBS (6KGX).

Structure of cyanobacterial phycobilisome core-SM

A

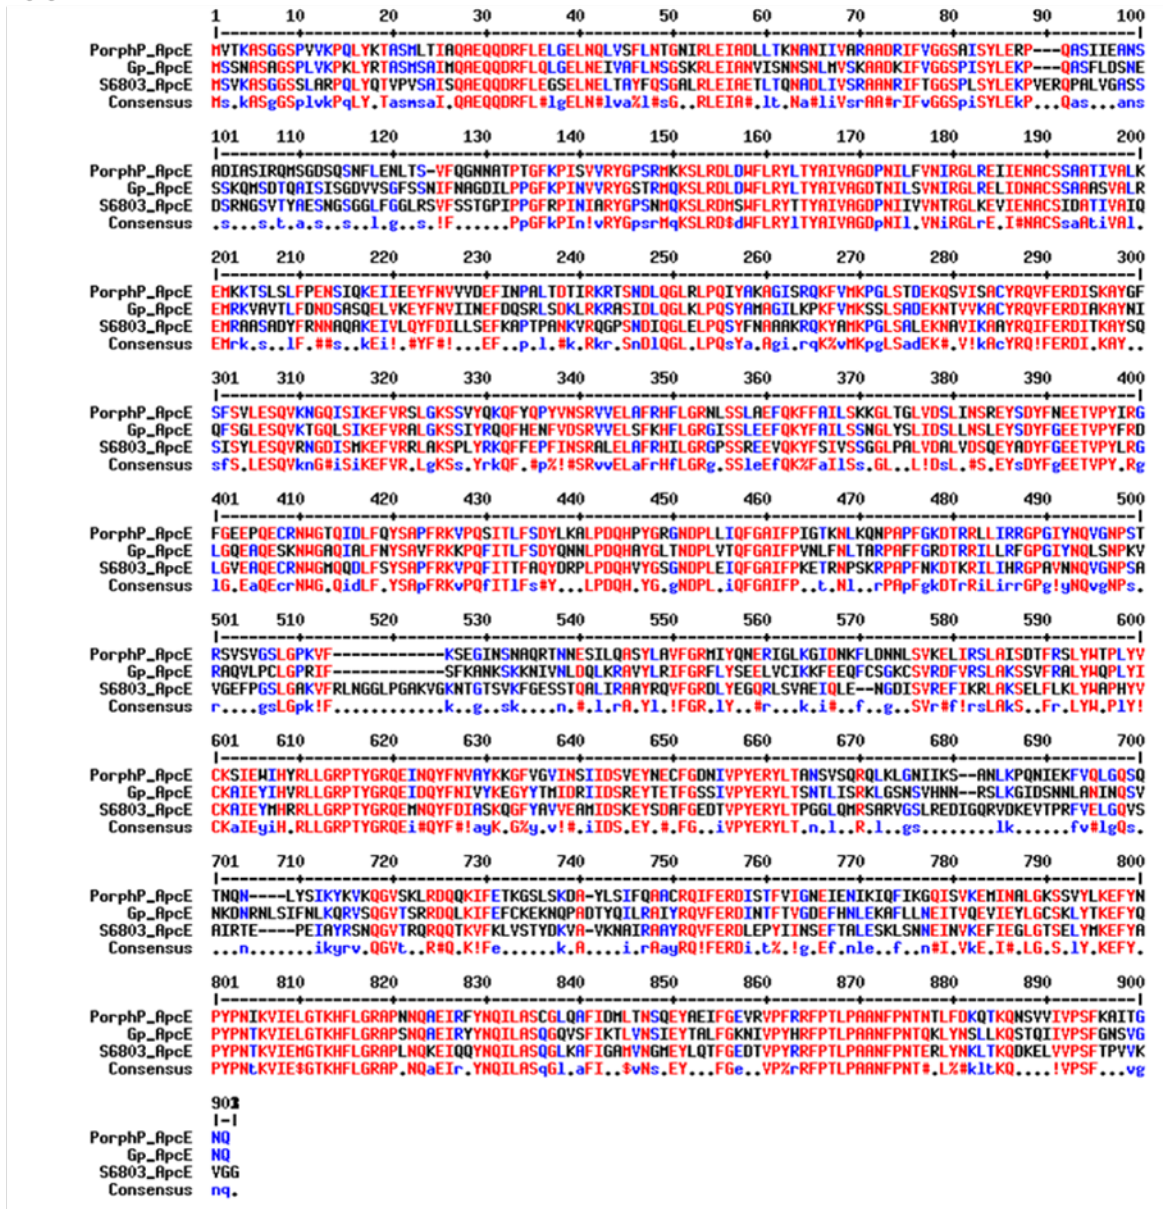

B

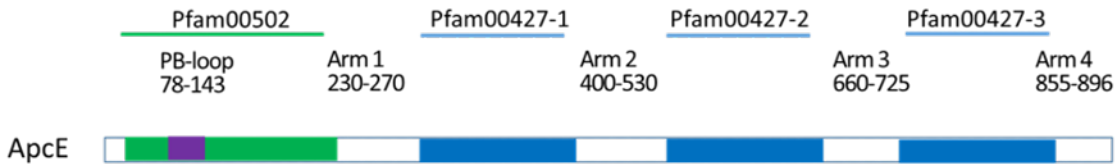

**Fig. S2. Sequence analysis of ApcE.** (A) Sequence alignment of ApcE from *Synechocystis* 6803, GpPBS (PDBID: 5Y6P), and PpPBS (PDBID: 6KGX). (B) Functional domains of ApcE (*Synechocystis* 6803).

## Structure of cyanobacterial phycobilisome core-SM

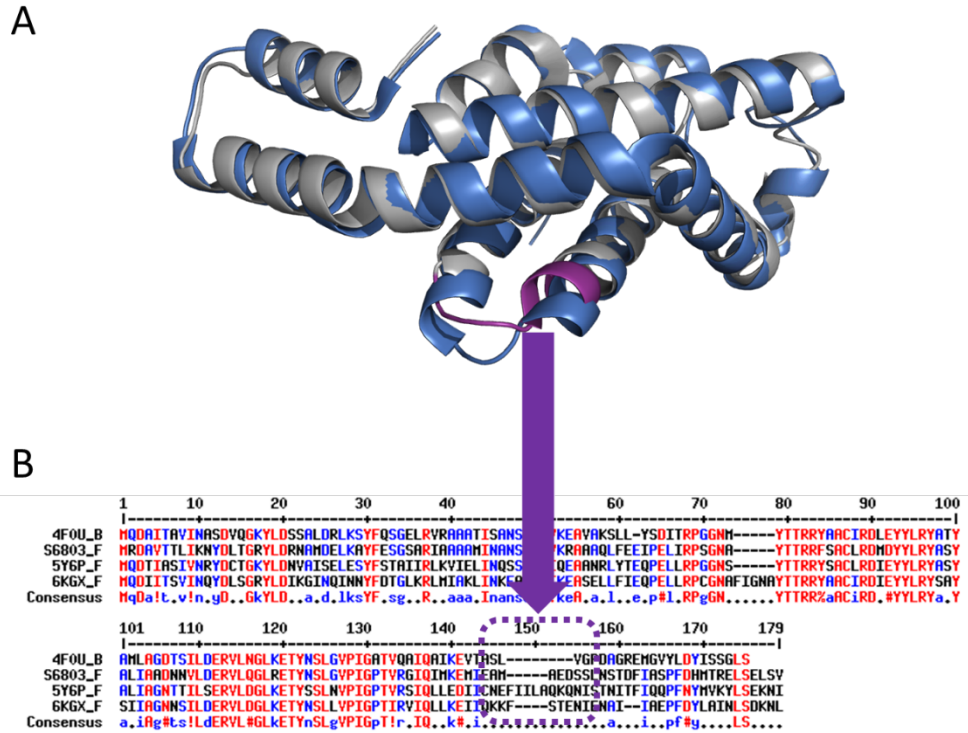

**Fig. S3. Structural variation of ApcF.** (A) Protein structure and sequence alignment of sApcF-M1 (S6803, grey) onto the PpApcF (marine). Highlighted region (purple) is the hypervariable region. (B) The sequence alignment of PpApcF and sApcF. Main sequence/secondary structure difference is boxed.

Structure of cyanobacterial phycobilisome core-SM

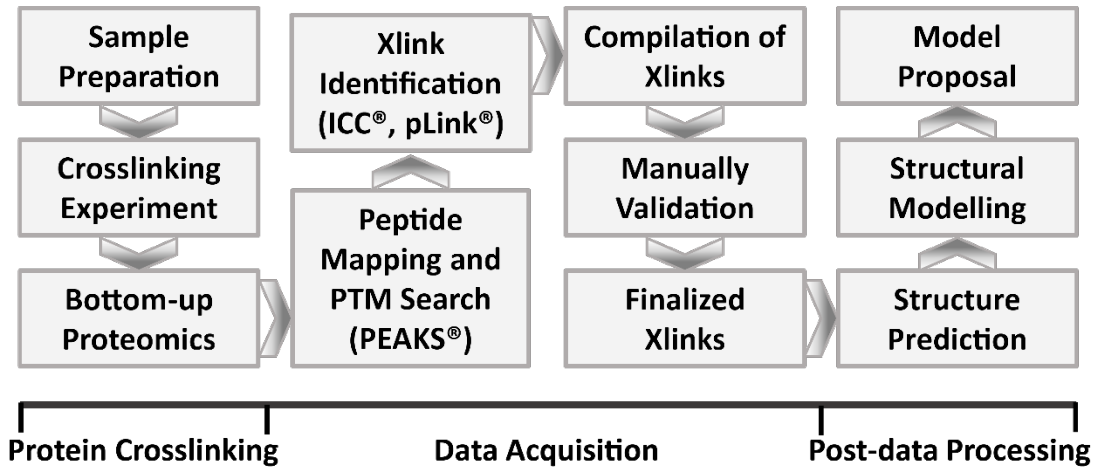

Fig. S4. Summarized workflow of this study.

## Structure of cyanobacterial phycobilisome core-SM

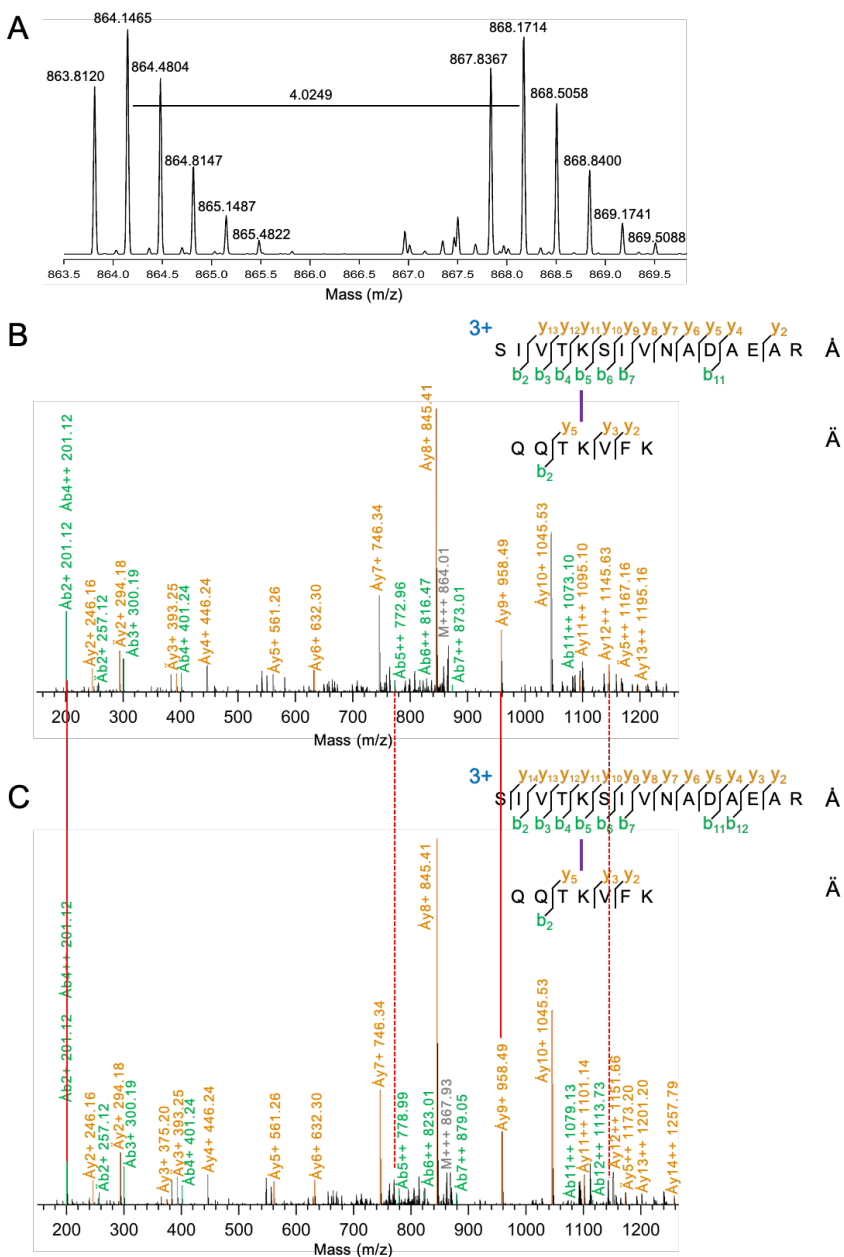

**Fig. S5. MS and MS/MS spectra of cross-link ApcA-K6-ApcE-K722.** (A) The MS1 spectra of the light and heavy cross-linked peptide ( $BS^3\text{-}H_{12}/D_{12}$ ) which are separated by  $m/z$  4.0249 ( $z=3$ ). (B). MS/MS spectra of the cross-linked peptide (light). (C). MS/MS spectra of the cross-linked peptide (heavy). Note, e.g.,  $m/z$  shift of ion  $\dot{A}b^{5+}$  (778.99) from C and ion  $\dot{A}b^{5+}$  (772.96) from B is 6.03. The mass difference is 12.06 Da total.  $\dot{A}b^{2+}$  and  $\dot{A}b^{9+}$  are control ions (solid line from B to C) with identical  $m/z$ .

## Structure of cyanobacterial phycobilisome core-SM

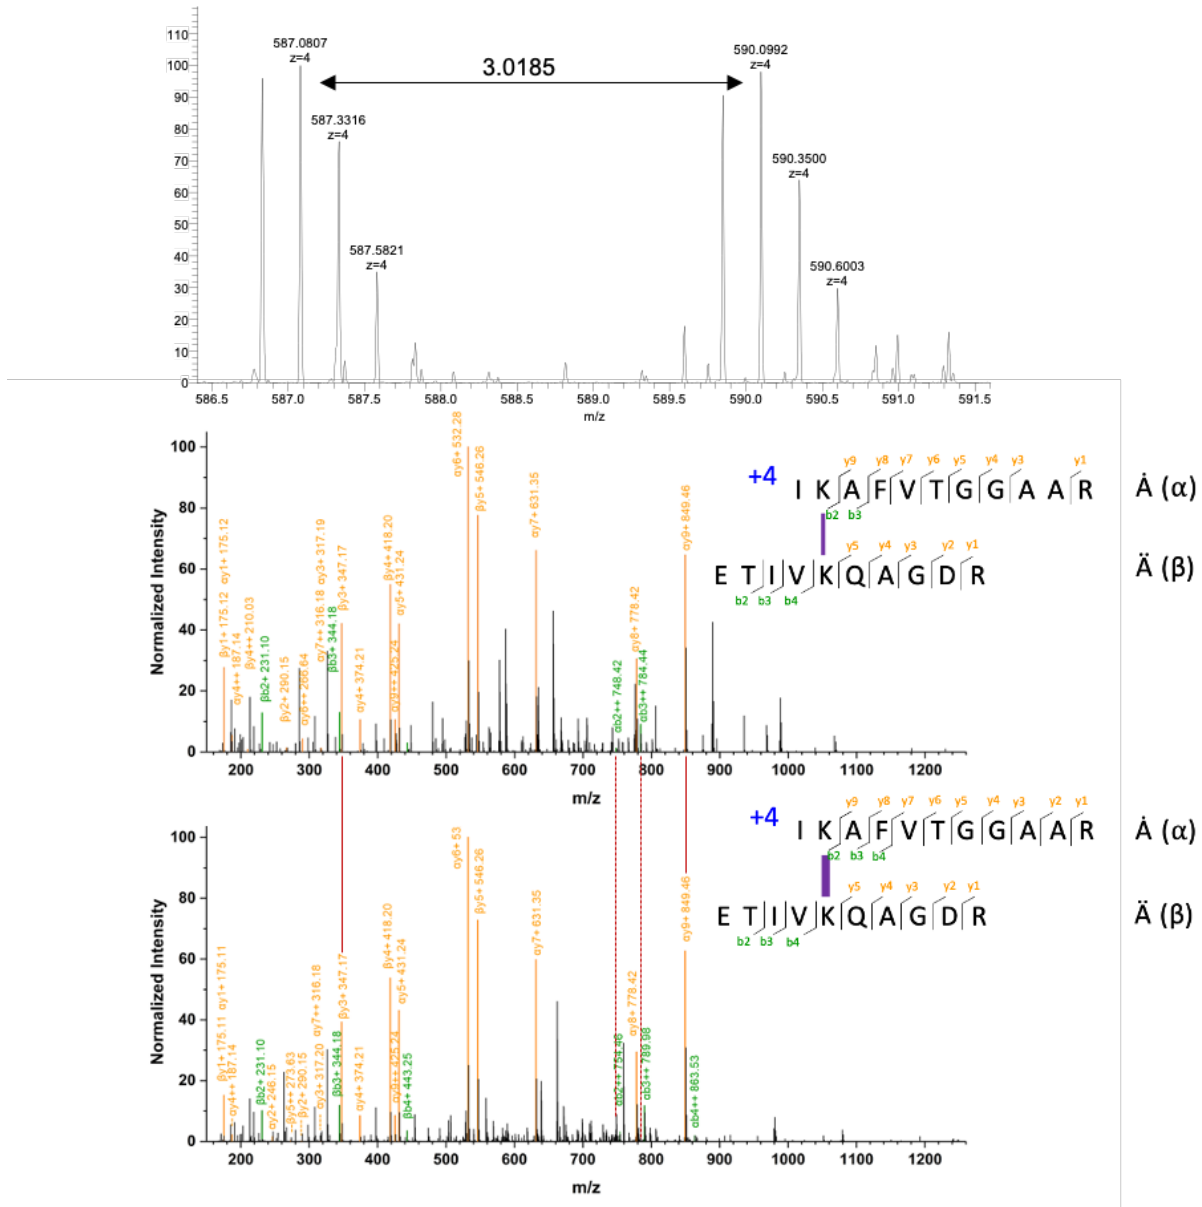

**Fig. S6. MS and MS/MS spectra of cross-link ApcA-K27–ApcA-K52.** (A) The MS1 spectrum of the light and heavy cross-linked peptide ( $BS^3$ -H<sub>12</sub>/D<sub>12</sub>) that are separated by m/z 3.0185 ( $z=4$ ). (B). MS/MS spectrum of the cross-linked peptide (light). (C). MS/MS spectrum of the cross-linked peptide (heavy). Note, e.g., 6.04 m/z shift of fragment ion  $\dot{A}b_{2++}$  (748.42) from B to fragment ion  $\dot{A}b_{2++}$ (754.46) from C is detected, indicating 12.08 Da mass difference from isotope labeling.  $\dot{A}y_{3+}$  and  $\dot{A}y_{9+}$  are control ions (solid line from B to C) with identical m/z.
